# Supplementary material for: Healthy Behaviors Associated with Changes in Mental and Physical Strength in Urban African American and White Adults
Source: MDPI journal article supplement (doi:10.3390/nu13061824), 2021-05-27
Supplement: s1 [file s1]

## Supplementary Tables

Table S1. Estimated coefficients of change in health behaviors with strength measures in HANDLS women

| Variables                                                                      | HGS      | SF-12 PCS | SF-12MCS |
|--------------------------------------------------------------------------------|----------|-----------|----------|
| Intercept                                                                      | 24.04*** | 35.23***  | 39.50*** |
| Age <sub>50</sub>                                                              | -0.24    | -1.08     | 1.06     |
| Age <sub>50</sub> <sup>2</sup>                                                 | 1.79     | 3.62      | 0.31     |
| Race, AA                                                                       | 4.64     | 10.74**   | 5.56     |
| SES, High                                                                      | 4.61*    | 11.81***  | 6.20     |
| DII <sub>average</sub>                                                         | 0.41     | 1.26      | 0.28     |
| Cigarette smoker, Not current                                                  | 0.82*    | 1.39*     | 1.48*    |
| Illicit Drug Use, Not current user                                             | 0.19     | 0.09      | 1.72*    |
| Age <sub>50</sub> x SES, high                                                  | -1.61    | -2.02     | -0.08    |
| Age <sub>50</sub> x Race, AA                                                   | -0.81    | -2.97     | -0.48    |
| Age <sub>50</sub> X DII <sub>average</sub>                                     | -0.29    | -0.07     | -0.02    |
| Race, AA x SES, high                                                           | -4.35    | -11.56**  | -3.09    |
| SES, high X DII <sub>average</sub>                                             | -0.87    | -2.07**   | -0.70    |
| Race, AA X DII <sub>average</sub>                                              | -0.67    | -2.16*    | -0.70    |
| Age <sub>50</sub> <sup>2</sup> x SES, high                                     | -2.64    | -3.77     | 0.20     |
| Age <sub>50</sub> <sup>2</sup> x Race, AA                                      | -2.51    | -5.27     | 1.95     |
| Age <sub>50</sub> <sup>2</sup> X DII <sub>average</sub>                        | -0.65    | -1.01*    | 0.74     |
| Age <sub>50</sub> x SES, high X Race, AA                                       | 1.53     | 4.09*     | -0.11    |
| Age <sub>50</sub> x SES, high x DII <sub>average</sub>                         | 0.21     | -0.00     | -0.05    |
| Age <sub>50</sub> X Race, AA x DII <sub>average</sub>                          | 0.05     | -0.00     | 0.10     |
| Race, AA x SES, high x DII <sub>average</sub>                                  | 1.11     | 2.76**    | 1.09     |
| Age <sub>50</sub> <sup>2</sup> x Race, AA x SES, high                          | 3.23     | 5.09      | -1.88    |
| Age <sub>50</sub> <sup>2</sup> x SES, high x DII <sub>average</sub>            | 0.86*    | 1.37*     | -1.00    |
| Age <sub>50</sub> <sup>2</sup> x Race, AA x DII <sub>average</sub>             | 0.80     | 1.31      | -0.96    |
| Age <sub>50</sub> <sup>2</sup> x Race, AA x SES, high x DII <sub>average</sub> | -1.12*   | -1.56*    | 1.01     |

\*p<0.05, \*\*p<0.01, \*\*\*p<0.001

Abbreviations: AA- African American, Age<sub>50</sub> – age centered at 50 years in decade units, DII – Dietary Inflammatory Index, HANDLS- Healthy Aging in Neighborhoods of Diversity across the Life Span, SES, high- Socio-Economic Status, high defined as either the household income was above 125% 2004 HHS poverty guidelines [35] or education ≥ 12 years

Table S2. Estimated coefficients of change in health behaviors with strength measures in HANDLS men

| Variables                          | HGS      | SF-12PCS | SF-12 MCS |
|------------------------------------|----------|----------|-----------|
| Intercept                          | 47.20*** | 45.66*** | 50.72***  |
| Age <sub>50</sub>                  | -2.14    | -3.67    | -2.22     |
| Age <sub>50</sub> <sup>2</sup>     | -2.53    | 0.91     | -1.22     |
| Race, AA                           | 1.13     | -5.67    | -3.96     |
| SES, High                          | -2.33    | .2.27    | -2.47     |
| DII <sub>average</sub>             | -1.39    | -1.75**  | -1.49*    |
| Cigarette smoker, Not current      | 1.62**   | 2.84***  | 0.25      |
| Illicit Drug Use, Not current user | 0.01     | -0.89    | 1.41*     |
| Age <sub>50</sub> x SES, high      | -0.63    | 0.80     | 2.97      |

|                                                                                |       |         |       |
|--------------------------------------------------------------------------------|-------|---------|-------|
| Age <sub>50</sub> x Race, AA                                                   | 0.56  | -1.10   | 2.91  |
| Age <sub>50</sub> X DII <sub>average</sub>                                     | -0.36 | -0.04   | 0.15  |
| Race, AA x SES, high                                                           | 0.78  | 4.27    | 5.68  |
| SES, high X DII <sub>average</sub>                                             | 0.62  | 1.30    | 1.18  |
| Race, AA X DII <sub>average</sub>                                              | 0.18  | 3.38*** | 1.63  |
| Age <sub>50</sub> <sup>2</sup> x SES, high                                     | 1.45  | -0.27   | 1.08  |
| Age <sub>50</sub> <sup>2</sup> x Race, AA                                      | -0.49 | 2.62    | 2.71  |
| Age <sub>50</sub> <sup>2</sup> X DII <sub>average</sub>                        | 0.29  | 0.48    | -0.01 |
| Age <sub>50</sub> x SES, high X Race, AA                                       | 0.16  | 0.70    | -2.63 |
| Age <sub>50</sub> x SES, high x DII <sub>average</sub>                         | 0.38  | 0.15    | -0.13 |
| Age <sub>50</sub> X Race, AA x DII <sub>average</sub>                          | -0.03 | 0.27    | -0.37 |
| Race, AA x SES, high x DII <sub>average</sub>                                  | -0.11 | -2.83** | -1.39 |
| Age <sub>50</sub> <sup>2</sup> x Race, AA x SES, high                          | 0.87  | -1.99   | -2.55 |
| Age <sub>50</sub> <sup>2</sup> x SES, high x DII <sub>average</sub>            | -0.14 | -0.61   | 0.16  |
| Age <sub>50</sub> <sup>2</sup> x Race, AA x DII <sub>average</sub>             | -0.22 | -1.66** | -0.14 |
| Age <sub>50</sub> <sup>2</sup> x Race, AA x SES, high x DII <sub>average</sub> | -0.04 | 1.50*   | 0.06  |

\*p<0.05, \*\*p<0.01, \*\*\*p<0.001  
Abbreviations: AA- African American, Age<sub>50</sub> – age centered at 50 years in decade units, DII – Dietary Inflammatory Index, HANDLS- Healthy Aging in Neighborhoods of Diversity across the Life Span, SES, high- Socio-Economic Status, high defined as either the household income was above 125% 2004 HHS poverty guidelines [35] or education ≥ 12 years

Table S3. Comparison of Mean Strength Measures of HANDLS study sample with US nationally representative sample stratified by age and sex [56,63].

|             | HGS    |      | SF-12PCS |      | SF-12 MCS |      |
|-------------|--------|------|----------|------|-----------|------|
|             | HANDLS | US   | HANDLS   | US   | HANDLS    | US   |
| Men         |        |      |          |      |           |      |
| 30-39 years | 48.3   | 47.2 | 52.4     | 53.5 | 50.4      | 52.1 |
| 40-49 years | 43.1   | 45.5 | 46.4     | 51.7 | 48.0      | 51.8 |
| 50-59 years | 38.2   | 42.1 | 42.8     | 49.4 | 48.5      | 51.6 |
| 60-69 years | 36.0   | 38.9 | 43.0     | 47.3 | 47.7      | 53.2 |
| Women       |        |      |          |      |           |      |
| 30-39 years | 30.5   | 30.0 | 47.7     | 52.4 | 46.4      | 49.2 |
| 40-49 years | 26.0   | 29.4 | 45.6     | 50.6 | 45.5      | 48.9 |
| 50-59 years | 24.0   | 27.5 | 41.1     | 48.2 | 47.0      | 49.8 |
| 60-69 years | 22.4   | 25.3 | 41.7     | 45.7 | 50.4      | 51.5 |

Abbreviations: HGS- handgrip strength, SF-12 PCS- Short Form-12 Physical Component Scores, SF-12 MCS- Short Form-12 Mental Component Scores, HANDLS- Healthy Aging in Neighborhoods of Diversity across the Life Span, US- United States
